# Supplementary material for: Structure and conserved function of iso-branched sphingoid bases from the nematode Caenorhabditis elegans
Source: PubMed Central journal article supplement — Chem Sci. 2017 Mar 6;8(5):3676–86. doi: 10.1039/c6sc04831e (PMC6094178; doi:10.1039/c6sc04831e), 2017-03-06

## Structure and conserved function of iso-branched sphingoid bases from the nematode *Caenorhabditis elegans*

J. Thomas Hannich<sup>1,3</sup>, Denia Mella<sup>2,3,4</sup>, Suihan Feng<sup>1,3</sup>, Andreas Zumbuehl<sup>2,3,\*</sup>, Howard Riezman<sup>1,3,\*</sup>

<sup>1</sup> Department of Biochemistry, University of Geneva, CH-1205 Geneva, Switzerland,

<sup>2</sup> Department of Chemistry, University of Fribourg, CH-1700 Fribourg, Switzerland,

<sup>3</sup> National Center of Competence in Research (NCCR) “Chemical Biology”,

<sup>4</sup> Current address: MRC Laboratory of Molecular Biology, Cambridge Biomedical Campus, Cambridge CB2 0QH, United Kingdom

\* Equal contribution.

Corresponding author: howard.riezman@unige.ch

### Supplementary Information on Chemical Synthesis

#### General scheme:

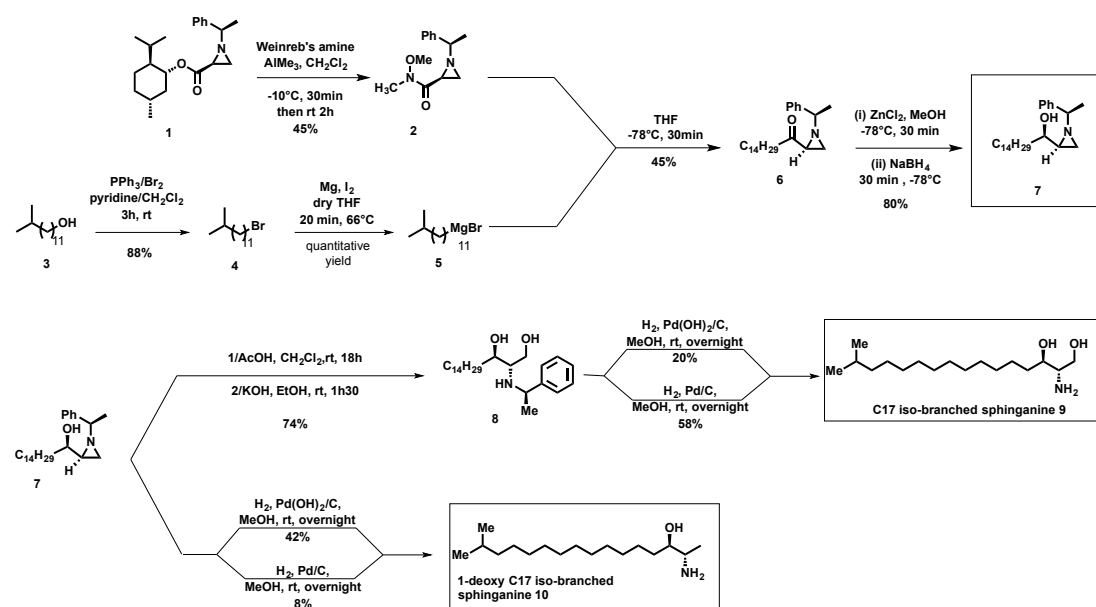

## Experimental Part:

### General reagents and materials

12-methyl tridecanol was from Endeavour Speciality Chemicals, all other starting compounds and solvents were purchased from Sigma-Aldrich/Fluka or Acros and were used without further purification. Column chromatographic separations were carried out using 230-400 mesh silica gel. TLC plates were developed with potassium permanganate mixture (1 g of  $\text{KMnO}_4$ , 2 g of  $\text{Na}_2\text{CO}_3$ , 100 mL of  $\text{H}_2\text{O}$ ).  $^1\text{H}$ , and  $^{13}\text{C}$  NMR spectra were recorded (as indicated) on either a Bruker 300 MHz or 400 MHz spectrometer and are reported as chemical shifts ( $\delta$ ) in ppm relative to TMS ( $\delta = 0$ ). Spin multiplicities are reported as a singlet (s) or triplet (t) with coupling constants ( $J$ ) given in Hz, or multiplet (m). ESI-MS for the characterization of compounds was performed on an ESI API 150EX and are reported as mass-per-charge ratio. IR spectra were recorded on a Perkin Elmer Spectrum One FT-IR spectrometer (ATR, Golden Gate). Optical rotation was measured on a Jasco P-1030 polarimeter. All reactions were performed under an Ar or  $\text{N}_2$  atmosphere.

### (*S*)-*N*-methoxy-*N*-methyl-1-((*R*)-1-phenylethyl)aziridine-2-carboxamide (**2**)

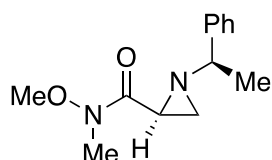

A literature protocol was followed.<sup>1</sup>

**Method A** : To (*2S*)-2-isopropyl-4-methoxycyclohexyl 1-((*R*)-1-phenylethyl)aziridine-2-carboxylate **1** (1.00 g, 2.89 mmol, 1 equiv.) and Weinreb's amine or *N,O*-dimethylhydroxylamine.HCl (450 mg, 7.4 mmol, 2.5 equiv.) in 10 mL THF was slowly added isopropyl magnesium chloride (4.60 mL, 9.2 mmol, 3.2 equiv., 2.0 M in THF) at 0 °C. The resulting mixture was warmed to rt and after 30 min, it was partitioned between  $\text{CH}_2\text{Cl}_2$  and  $\text{H}_2\text{O}$ . The water phase was washed with  $\text{CH}_2\text{Cl}_2$  ( $3 \times 20$  mL). The combined organic solvents were dried over  $\text{MgSO}_4$  and the solvent was evaporated under reduced pressure. The crude product was purified on a silica gel column (EtOAc/Pentane gradient 1:1 to 1:0) in order to give Weinreb's amide or *N*-(*R*)-(+)- $\alpha$ -methylbenzyl-2-(*S*)-aziridine *N*-Methoxy-*N*-methylcarboxamide **2** as a white powder (298 mg, 44 %).

**Method B** : To the solid of *N,O*-dimethylhydroxylamine-HCl (880 mg, 9.11 mmol, 3 equiv.) in 10 mL of  $\text{CH}_2\text{Cl}_2$  was carefully added trimethylaluminium (4.55 mL, 9.11 mmol, 3 equiv., 2.00M) under nitrogen at -10 °C. The solution was stirred for 30 min at rt and then a solution of (*2S*)-2-isopropyl-4-methoxycyclohexyl 1-((*R*)-1-phenylethyl)aziridine-2-carboxylate **1** (1.00 g, 3.04 mmol) in 5.0 mL  $\text{CH}_2\text{Cl}_2$  was added dropwise at -10 °C. The mixture was stirred for 2 h at rt. Then the reaction was quenched carefully with water and the organic layer was separated. After extraction with  $\text{CH}_2\text{Cl}_2$  ( $3 \times 20$  mL), the combined organic layers were dried, filtered, and concentrated under vacuum. Purification by silica gel flash chromatography (EtOAc/cyclohexane, 75:15 to 50:50 to 100:0) yielded pure *N*-(*R*)-(+)- $\alpha$ -methylbenzyl-2-(*S*)-aziridine *N*-Methoxy-*N*-methylcarboxamide **2** as an oil (321 mg, 45%).

$[\alpha]^{22}_{\text{D}} = + 13.1$  (c 1.00,  $\text{CHCl}_3$ ).<sup>2</sup>

$R_f = 0.10$  (EtOAc/Pentane 1:0).

$^1\text{H}$  NMR (300 MHz,  $\text{CDCl}_3$ ) :  $\delta = 7.44 - 7.08$  (m, 5H) , 3.11 (d,  $J = 8.3$  Hz, 6H), 2.55 (q,  $J = 6.4$  Hz, 2H), 2.40 (d,  $J = 3.0$  Hz, 1H), 1.74 (d,  $J = 6.4$  Hz, 1H), 1.46 (d,  $J = 6.5$  Hz, 3H).

<sup>1</sup> J-W. Kim, Y-W. Kim, Y. Inagaki, Y-A. Hwang, S. Mitsutake, Y-W. Ryu, W. K. Lee, H-J. Ha, C-S. Park, Y. Igarashi, *Bioorganic & Medicinal Chemistry*, **2005**, *13*, 3475-3485.

<sup>2</sup> This value has been confirmed by personal communication with Ha *et al.* The reported value in *J. Org. Chem.* **2003**, *68*, 7675-7680 stands corrected.

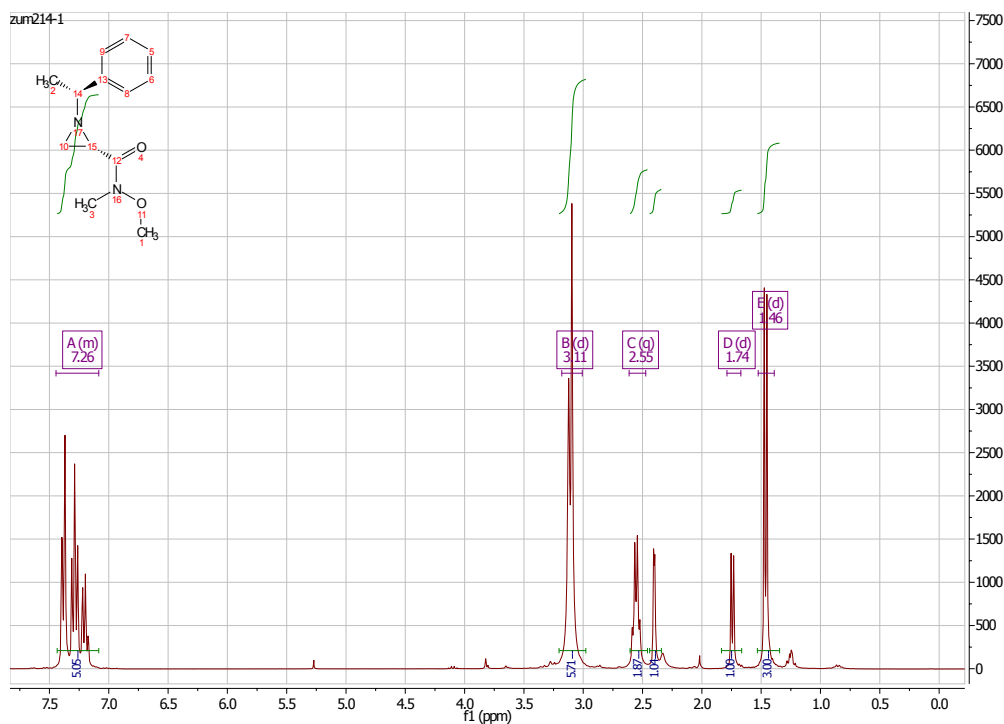

#### 1-bromo-12-methyltridecane (4)

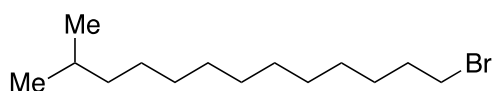

**Method A** : 12-methyl-1-tridecanol **3** (1.00 g, 4.66 mmol) was dissolved in  $\text{CH}_3\text{CN}$  and bromotrimethylsilane (1.79 g, 11.7 mmol, 2.5 equiv.) was added. The solution was heated to  $90\text{ }^\circ\text{C}$  for 5 h. Then 2 mL  $\text{H}_2\text{O}$  were added. The solvents were removed under reduced pressure and the crude material was purified on a silica gel column (hexanes) in order to give 1-bromo-12-methyltridecane as a clear oil (380 mg, 29 %).

**Method B** : 12-methyl-1-tridecanol **3** (2.00 g, 9.3 mmol) was dissolved in  $\text{CH}_2\text{Cl}_2$  (25 mL) and  $\text{PPh}_3$  (4.40 g, 16.6 mmol, 1.2 equiv.), and pyridine (1.3 mL, 16.6 mmol, 1.2 equiv.) were added. The flask was cooled down to  $0\text{ }^\circ\text{C}$  after that bromine  $\text{Br}_2$  was added dropwise (0.56 mL, 16.6 mmol, 1.2 equiv.). The solution became orange and the reaction was stirred for 3 h at rt. The solvent was removed under reduced pressure and the orange crude material was filtered on a silica gel column using  $\text{CH}_2\text{Cl}_2$  to afford to 1-bromo-12-methyltridecane **4** as yellow oil (3.42 g, 88 %).

$R_f = 0.75$  (Hexanes).

$^1\text{H NMR}^3$  (400 MHz,  $\text{CDCl}_3$ ) :  $\delta = 3.45$  (t,  $J = 6.9$  Hz, 2H), 1.98 – 1.79 (m, 2H), 1.66 – 1.51 (m, 1H), 1.47 (dd,  $J = 14.3, 7.0$  Hz, 2H), 1.32 (d,  $J = 7.3$  Hz, 14H), 1.20 (dd,  $J = 13.3, 6.5$  Hz, 2H), 0.92 (d,  $J = 6.6$  Hz, 6H).

<sup>3</sup> J. Y. Mun, A. Onorato, F. C. Nichols, M. D. Morton, A. I. Saleh, M. Welzel, M. B. Smith. *Organic & Biomolecular Chemistry*, **2007**, *5*, 3826-3833.

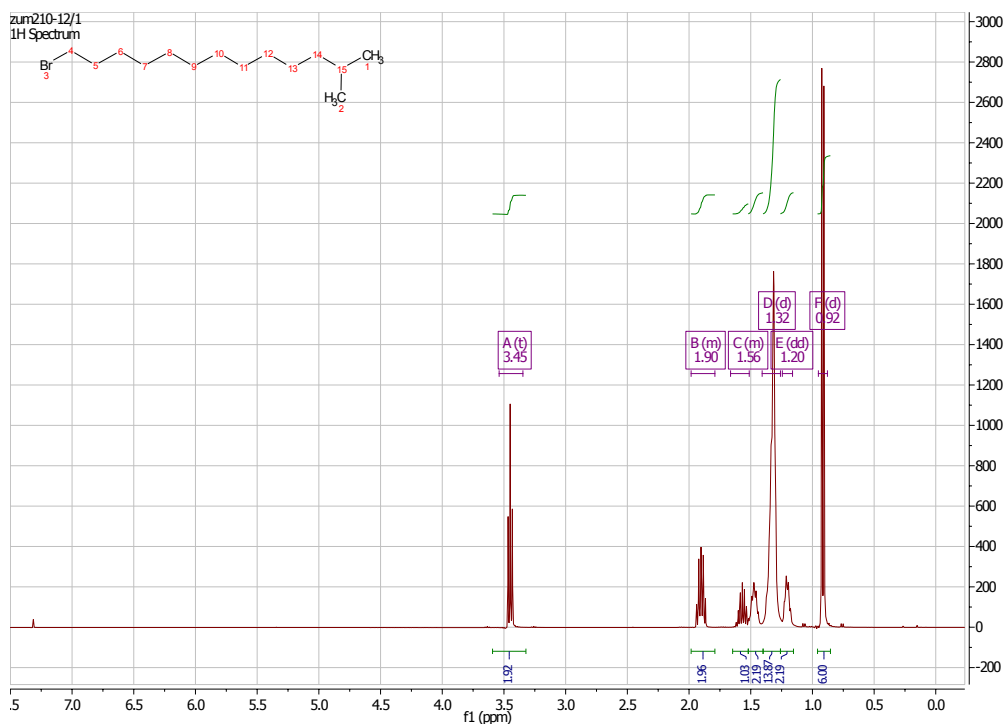

### 13-methyl-1-((*S*)-1-((*R*)-1-phenylethyl)aziridin-2-yl)tetradecan-1-one (6)

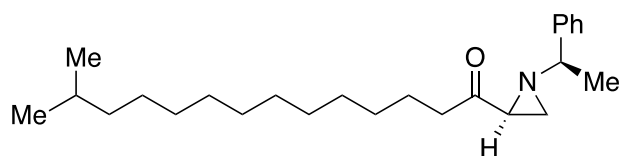

1-bromo-12-methyltridecane **4** (413 mg, 1.7 mmol, 1.5 equiv.) was dissolved in 2 mL THF. Mg turnings (40.3 mg, 1.7 mmol, 1.5 equiv.) were added together with a drop of I<sub>2</sub>. The reaction was heated in order to initiate the Grignard reaction. The mixture of **5** was slowly added to (*S*)-*N*-methoxy-*N*-methyl-1-((*R*)-1-phenylethyl)aziridine-2-carboxamide **2** (259 mg, 1.1 mmol) in 5 mL THF at -78 °C. The reaction was stirred for 30 min and then the cold-bath was removed. After reaching rt, the mixture was quenched with 5 mL H<sub>2</sub>O and extracted with CH<sub>2</sub>Cl<sub>2</sub> (3 × 10 mL). The organic phase was dried over MgSO<sub>4</sub>, filtered, and the solvents were removed under reduced pressure. The crude material was purified on a silica gel column (EtOAc/Pentane 1:4) and the pure compound **6** was isolated as a clear oil (199 mg, 0.54 mmol, 48 %).

$[\alpha]_D^{24} = -53.9$  (c 1.00, CHCl<sub>3</sub>).

$R_f = 0.40$  (EtOAc: Pentane 1:9).

HRMS-ESI (m/z) : [M+H]<sup>+</sup> calcd for C<sub>25</sub>H<sub>42</sub>NO: 372.326; found 372.3259.

IR (Golden Gate) : 2925 (s), 2853 (m), 1702 (m), 1451 (w).

<sup>1</sup>H NMR (300 MHz, CDCl<sub>3</sub>) :  $\delta$  = 7.28 – 7.15 (m, 5H), 2.48 (q,  $J = 6.6$  Hz, 1H), 2.37 – 2.25 (m, 1H), 2.23 – 2.11 (m, 2H), 2.06 (dd,  $J = 6.7, 3.1$  Hz, 1H), 1.73 (d,  $J = 6.8$  Hz, 1H), 1.53 – 1.43 (m, 1H), 1.42 – 1.31 (m, 5H), 1.26 – 1.02 (m, 18H), 0.81 (d,  $J = 6.6$  Hz, 6H).

$^{13}\text{C}$  NMR (101 MHz,  $\text{CDCl}_3$ ) :  $\delta = 208.73, 143.96, 128.48, 127.30, 126.59, 70.05, 44.02, 39.10, 38.65, 35.47, 29.99, 29.76, 29.71, 29.66, 29.50, 29.41, 29.19, 28.01, 27.47, 23.47, 22.72.$

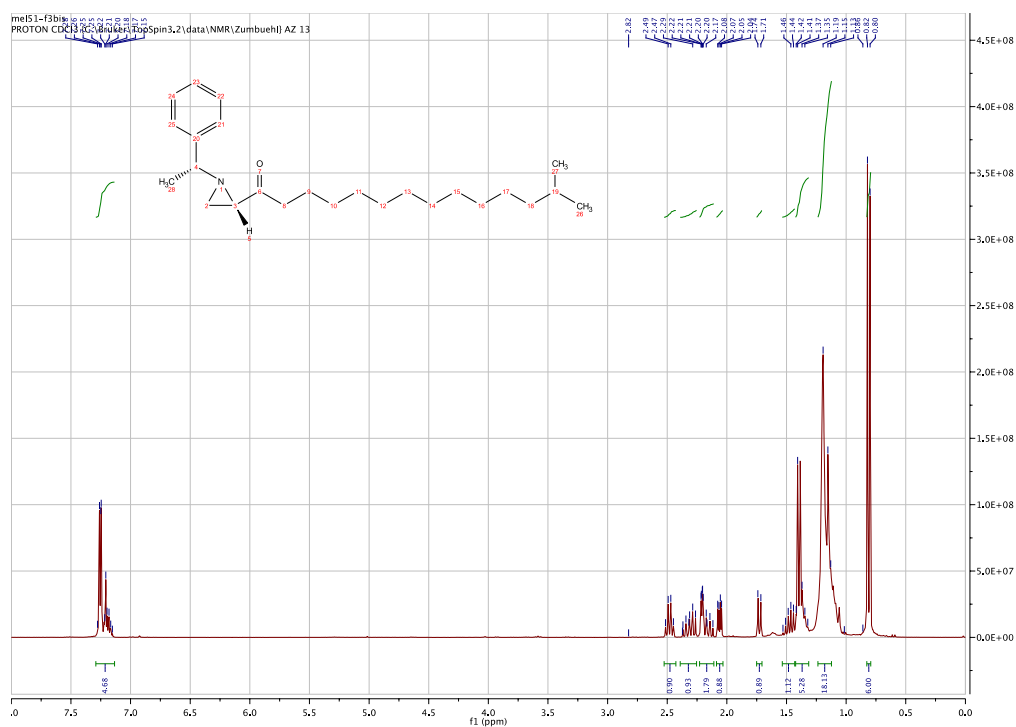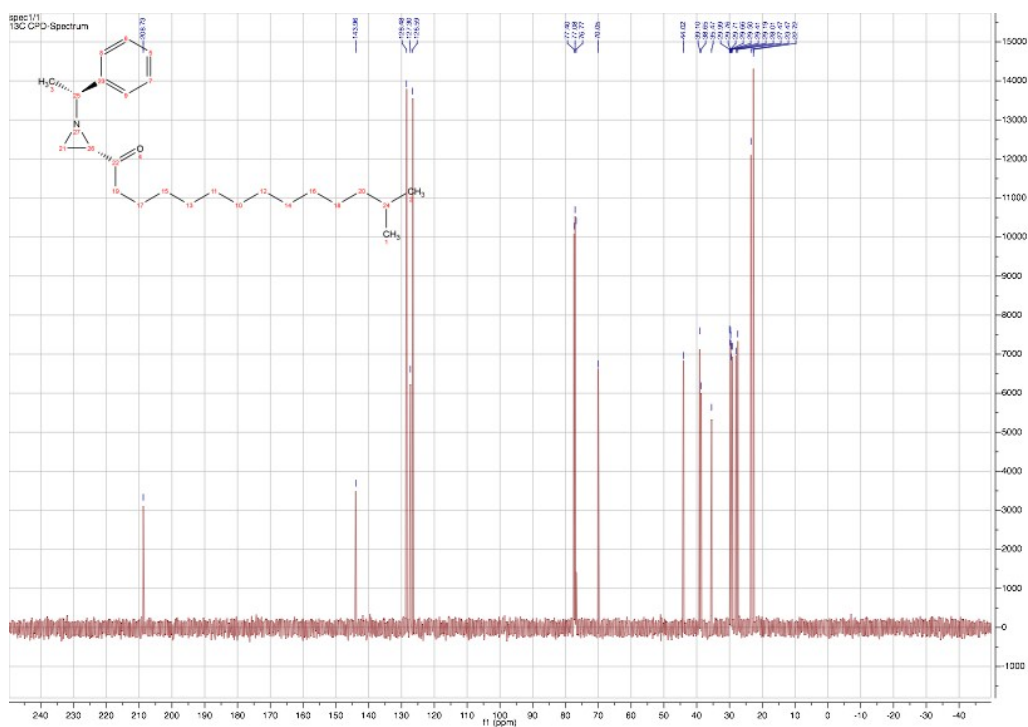

**(R)-13-methyl-1-((S)-1-((R)-1-phenylethyl)aziridin-2-yl)tetradecan-1-ol (7)**

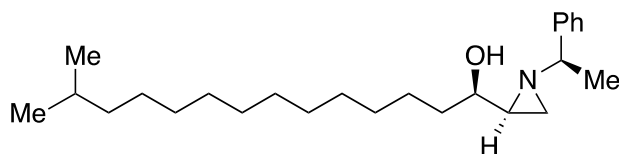

**Method A** : To 13-methyl-1-((S)-1-((R)-1-phenylethyl)aziridin-2-yl)tetradecan-1-one **6** (150 mg, 404  $\mu\text{mol}$ ) in 2 mL dry MeOH at  $-78\text{ }^\circ\text{C}$ , was added  $\text{ZnCl}_2$  (81.0 mg, 594  $\mu\text{mol}$ , 1.47 equiv.). After 30 min.  $\text{NaBH}_4$  (29.5 mg, 780  $\mu\text{mol}$ , 1.9 equiv.) was added and the mixture was stirred for additional 30 min. Then, 5 mL  $\text{H}_2\text{O}$  was added at  $-78\text{ }^\circ\text{C}$  and the reaction was left to reach rt. The water phase was extracted with  $\text{CH}_2\text{Cl}_2$  ( $3 \times 10\text{ mL}$ ). The organic phase was dried over  $\text{MgSO}_4$ , filtered, and evaporated under reduced pressure. The crude material was purified on a silica gel column (EtOAc/Hexanes 3:7) and the pure compound **7** was isolated (95.0 mg, 254  $\mu\text{mol}$ , 63 %).

**Method B** : To 13-methyl-1-((S)-1-((R)-1-phenylethyl)aziridin-2-yl)tetradecan-1-one **6** (55 mg, 148  $\mu\text{mol}$ ) in 2 mL dry MeOH at  $-78\text{ }^\circ\text{C}$  was added  $\text{ZnCl}_2$  (29.7 mg, 217.8  $\mu\text{mol}$ ). After 30 min.  $\text{NaBH}_4$  (10.8 mg, 285.5  $\mu\text{mol}$ , 1.47 equiv.) was added and the mixture was stirred for additional 30 min. Then,  $\text{H}_2\text{O}$  (1 mL) was added at  $-78\text{ }^\circ\text{C}$  and the reaction was left to reach rt. The water phase was extracted 3 times with  $\text{CH}_2\text{Cl}_2$ . The organic solvent was dried over  $\text{MgSO}_4$ , filtered, and evaporated under reduced pressure. The crude material **7** (44 mg, crude yield : 80 %) was directly used in the followed step.

$[\alpha]_D^{24} = +7.0$  (c 0.50,  $\text{CHCl}_3$ ).

$R_f = 0.10$  (EtOAc/Hexanes 3:7).

HRMS-ESI (m/z):  $[\text{M}+\text{H}]^+$  calcd for  $\text{C}_{25}\text{H}_{44}\text{NO}$ : 374.3417; found 374.3413.

IR (Golden Gate): 2926 (s), 2851 (m), 1703 (m), 1371 (m), 1287 (m).

$^1\text{H}$  NMR (300 MHz,  $\text{CDCl}_3$ ) :  $\delta = 7.30 - 7.23$  (m, 4H), 7.22 - 7.13 (m, 1H), 3.52 - 3.41 (m, 1H), 2.53 (q,  $J = 6.5\text{ Hz}$ , 1H), 1.92 (d,  $J = 3.4\text{ Hz}$ , 1H), 1.55 - 1.48 (m, 1H), 1.47 - 1.39 (m, 1H), 1.38 - 1.30 (m, 4H), 1.26 - 1.01 (m, 22H), 0.81 (d,  $J = 6.6\text{ Hz}$ , 6H).

$^{13}\text{C}$  NMR (101 MHz,  $\text{CDCl}_3$ ) :  $\delta = 144.35, 128.47, 127.20, 126.64, 99.99, 69.36, 68.34, 42.17, 39.10, 34.71, 29.99, 29.77, 29.72, 29.63, 29.57, 28.01, 27.47, 25.27, 23.15, 22.72$ .

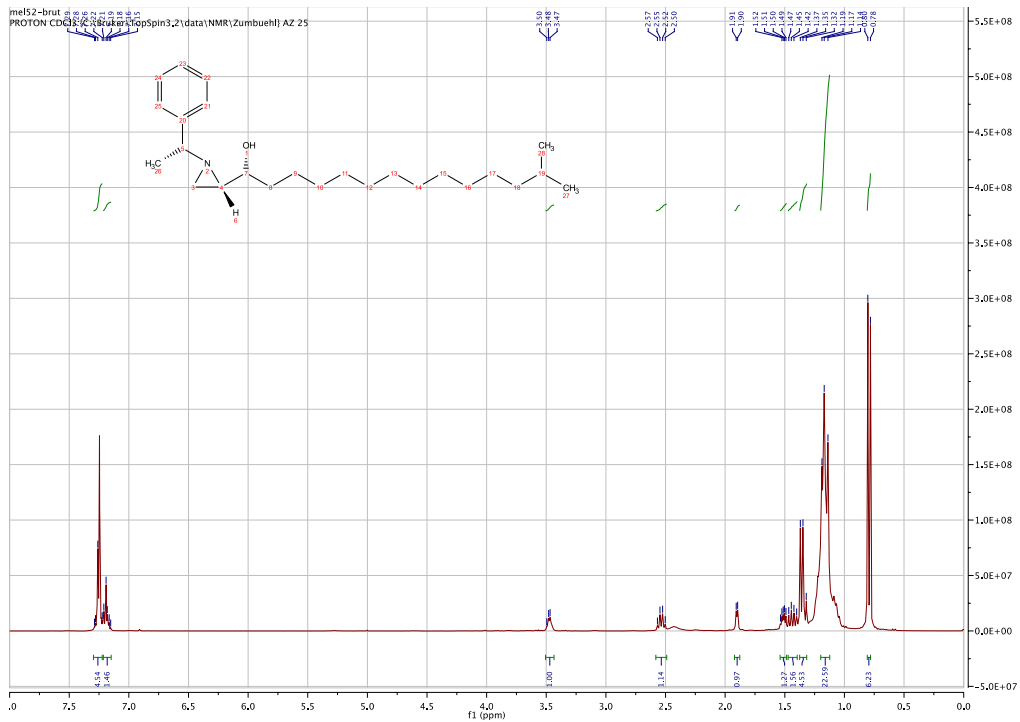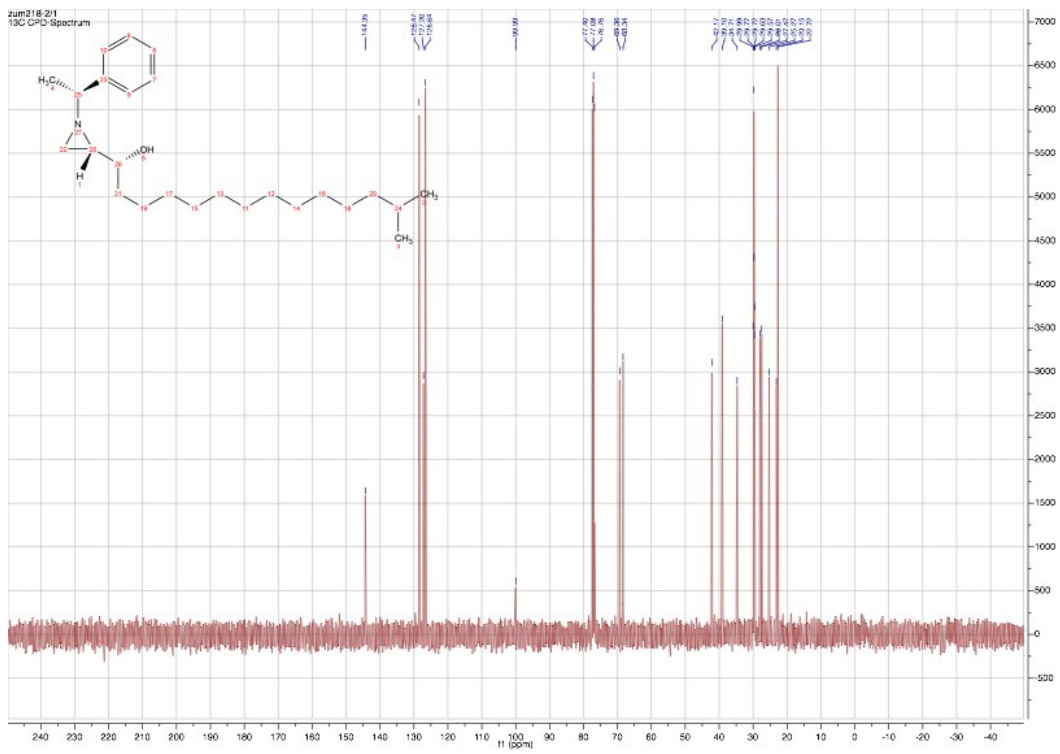

**(2*S*,3*R*)-15-methyl-2-(((*R*)-1-phenylethyl)amino)hexadecane-1,3-diol (8)**

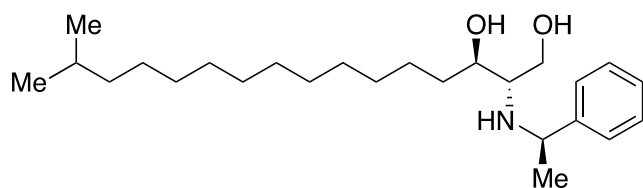

**Method A** : To (*R*)-13-methyl-1-((*S*)-1-((*R*)-1-phenylethyl)aziridin-2-yl)tetradecan-1-ol **7** (82.2 mg, 220  $\mu$ mol) in 2 mL of  $\text{CH}_2\text{Cl}_2$  was added acetic acid (66.0  $\mu$ L, 1.10 mmol, 5 equiv.) and the reaction was stirred for 18 h. Then 1 mL of  $\text{NaHCO}_3$  (sat.) was added and the solution was extracted with  $\text{CH}_2\text{Cl}_2$  ( $4 \times 10$  mL). The organic phase was dried over  $\text{MgSO}_4$ , filtered and the solvent was evaporated under reduced pressure. The crude material was purified over a short silica gel column (EtOAc) to give pure compound **8** (28.3 mg, 72.2  $\mu$ mol, 33 %).

**Method B** : To (*R*)-13-methyl-1-((*S*)-1-((*R*)-1-phenylethyl)aziridin-2-yl)tetradecan-1-ol **7** (25 mg, 66  $\mu$ mol) in 0.8 mL of  $\text{CH}_2\text{Cl}_2$  was added acetic acid (20.0  $\mu$ L, 0.33 mmol, 5 equiv.) and the reaction was stirred for 2 days. Then 16  $\mu$ L of acetic acid were added and the mixture was stirred for 2 h. Then 5 mL of  $\text{NaHCO}_3$  (sat.) was added and the solution was extracted with  $\text{CH}_2\text{Cl}_2$  ( $3 \times 10$  mL) and brine ( $3 \times 10$  mL). The organic phase was dried over  $\text{MgSO}_4$ , filtered and the solvent was evaporated under reduced pressure. The crude product (clear oil, colorless) was purified over a short silica gel column (EtOAc), dissolved in 5 mL of  $\text{CH}_2\text{Cl}_2$  and 20  $\mu$ L of acetic acid were added. After 18 h, the reaction was quenched with 1 mL of  $\text{NaHCO}_3$  and the solution was extracted with  $\text{CH}_2\text{Cl}_2$  ( $3 \times 10$  mL). The organic phase was dried over  $\text{MgSO}_4$ , filtered and the solvent was evaporated under reduced pressure. Then, the product was dissolved in 0.5 mL of EtOH and 4.2 mg (75  $\mu$ mol) of KOH were added. After stirring for 1.5 h the solvent was evaporated under reduced pressure. After the addition of  $\text{H}_2\text{O}$ , the solution was extracted with  $\text{CH}_2\text{Cl}_2$  ( $3 \times 10$  mL), the organic phase was dried over  $\text{MgSO}_4$ , filtered and the solvent was evaporated under reduced pressure. A short silica gel column (EtOAc) afforded compound **8** (19 mg, 50  $\mu$ mol) in 74 % yield.

$[\alpha]_D^{24} = +21.5$  (c 1.00,  $\text{CHCl}_3$ ).

$R_f = 0.19$  (EtOAc).

HRMS-ESI (m/z):  $[\text{M}+\text{H}]^+$  calcd for  $\text{C}_{25}\text{H}_{46}\text{NO}_2$ : 392.3523; found 392.3526.

IR (Golden Gate): 3349 (br), 2923 (s), 2852 (m), 1466 (m), 1366 (s), 1065 (m).

$^1\text{H}$  NMR (400 MHz,  $\text{CDCl}_3$ ) :  $\delta = 7.36$  (dd,  $J = 10.2, 2.8$  Hz, 4H), 7.33 – 7.19 (m, 1H), 3.96 (q,  $J = 6.5$  Hz, 1H), 3.76 (d,  $J = 4.1$  Hz, 2H), 3.63 – 3.52 (m, 1H), 2.49 (dd,  $J = 8.0, 4.0$  Hz, 2H), 1.62 – 1.52 (m, 1H), 1.48 – 1.40 (m, 6H), 1.35 – 1.18 (m, 20H), 0.91 (d,  $J = 6.6$  Hz, 6H).

$^{13}\text{C}$  NMR (101 MHz,  $\text{CDCl}_3$ ) :  $\delta = 145.64, 128.59, 127.18, 126.62, 73.59, 60.28, 58.92, 55.94, 39.10, 33.80, 29.99, 29.77, 29.72, 29.69, 29.63, 29.59, 29.56, 28.01, 27.47, 26.12, 24.60, 22.71$ .



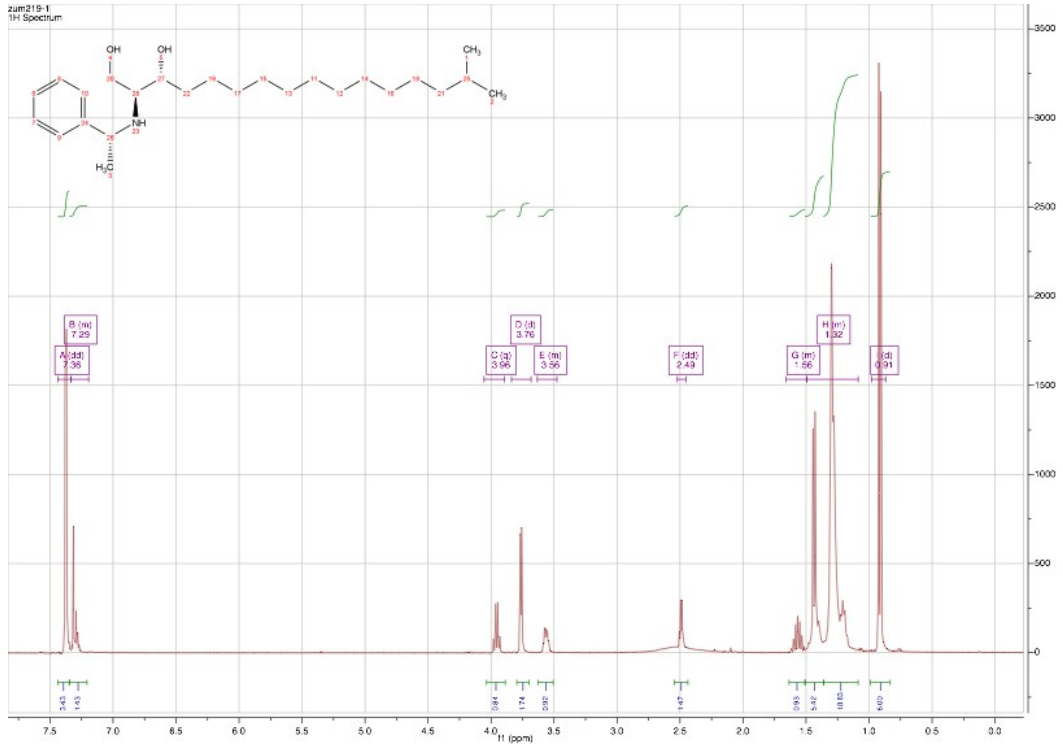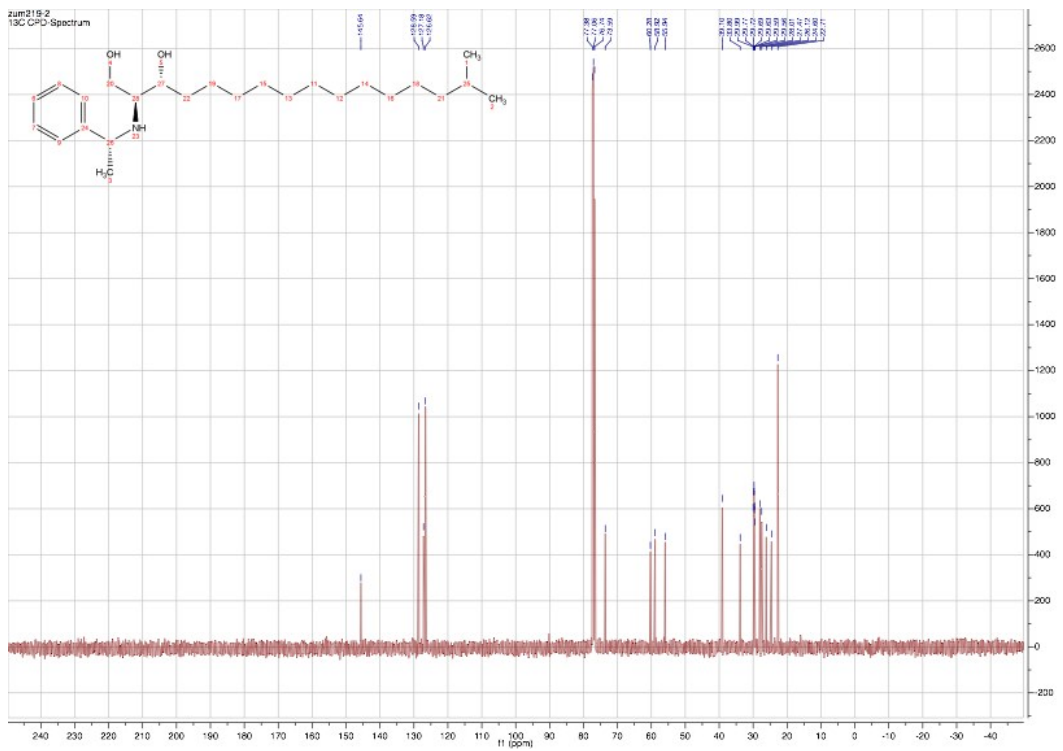

**(2*S*,3*R*)-2-amino-15-methylhexadecane-1,3-diol (9)**

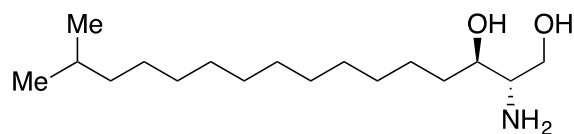

**Method A** : To (2*S*,3*R*)-15-methyl-2-(((*R*)-1-phenylethyl)amino)hexadecane-1,3-diol **8** (28.3 mg, 72  $\mu\text{mol}$ ) in 5 mL MeOH was added Pd(OH)<sub>2</sub>/C (5 mg) and the mixture was stirred under 1 atm. of H<sub>2</sub> for 48 h. Then the mixture was filtered and the solvents were evaporated under reduced pressure. The crude material was purified on a silica gel column (CH<sub>2</sub>Cl<sub>2</sub>/MeOH/NH<sub>4</sub>OH 0.875:0.11:0.015) to give compound **9** (4.20 mg, 14.6  $\mu\text{mol}$ ) in 20 % yield.

**Method B** : To (2*S*,3*R*)-15-methyl-2-(((*R*)-1-phenylethyl)amino)hexadecane-1,3-diol **8** (27 mg, 48  $\mu\text{mol}$ ) in 5 mL MeOH was added Pd/C (10 mg) and the mixture was stirred under 1 atm. of H<sub>2</sub> overnight. Then the mixture was filtered over celite and the solvent was evaporated under reduced pressure to afford to the compound **9** (8 mg, 27.8  $\mu\text{mol}$ ) in 58 % yield.

$[\alpha]_D^{22} = -4.4$  (c 0.33, CHCl<sub>3</sub>).

$R_f = 0.27$  (CH<sub>2</sub>Cl<sub>2</sub>/MeOH/NH<sub>4</sub>OH 0.875:0.11:0.015).

HRMS-ESI (m/z) : [M+H]<sup>+</sup> calcd for C<sub>17</sub>H<sub>38</sub>NO<sub>2</sub>: 288.2897; found 288.2892.

IR (Golden Gate) : 3339 (br), 2922 (s), 2852 (m), 1467 (m), 1384 (w), 1366 (w), 1215 (w), 1051 (w).

<sup>1</sup>H NMR (500 MHz, CDCl<sub>3</sub>) :  $\delta = 3.73 - 3.67$  (m, 2H), 3.66 - 3.58 (m, 1H), 2.88 (br, OH, OH, NH<sub>2</sub>, 4H), 2.81 - 2.80 (m, 1H), 1.55 - 1.45 (m, 4H), 1.30 - 1.26 (m, 17H), 1.15 (dt,  $J = 7.3, 6.5$  Hz, 2H), 0.86 (d,  $J = 6.6$  Hz, 6H).

<sup>13</sup>C NMR (126 MHz, CDCl<sub>3</sub>) :  $\delta = 74.48, 63.34, 55.77, 39.08, 33.84, 29.97, 29.76, 29.74, 29.72, 29.71, 29.68, 27.98, 27.44, 26.14, 22.67$ .

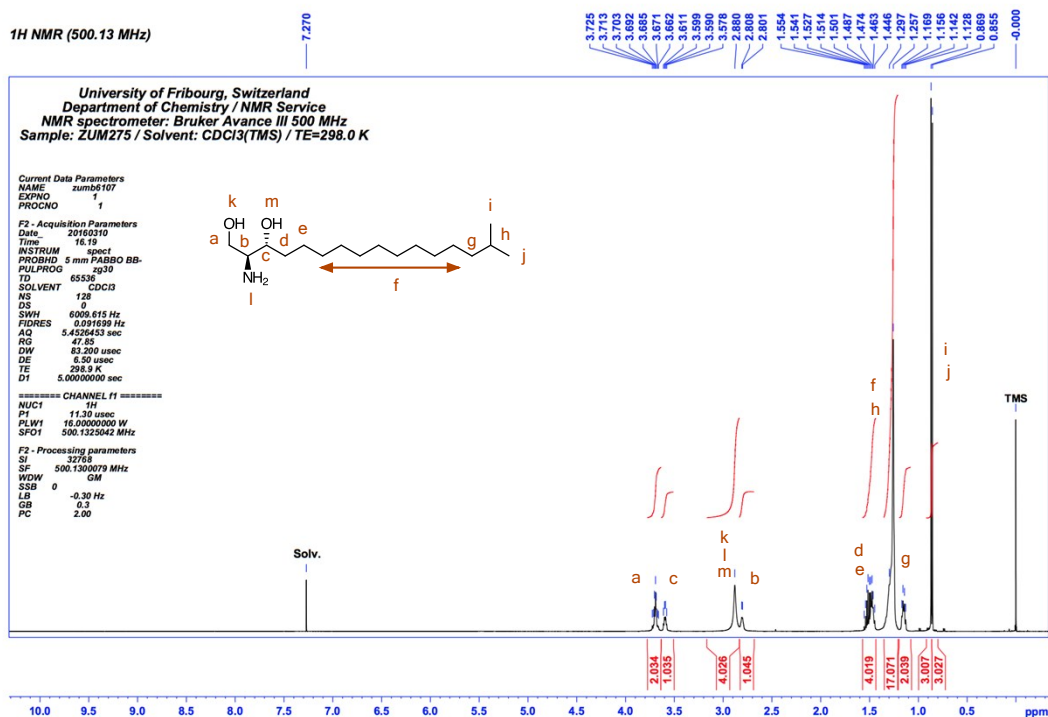

University of Fribourg, Switzerland  
 Department of Chemistry / NMR Service  
 NMR spectrometer: Bruker Avance III 500 MHz  
 Sample: ZUM275 / Solvent: CDCl<sub>3</sub>(TMS) / TE=298.0 K

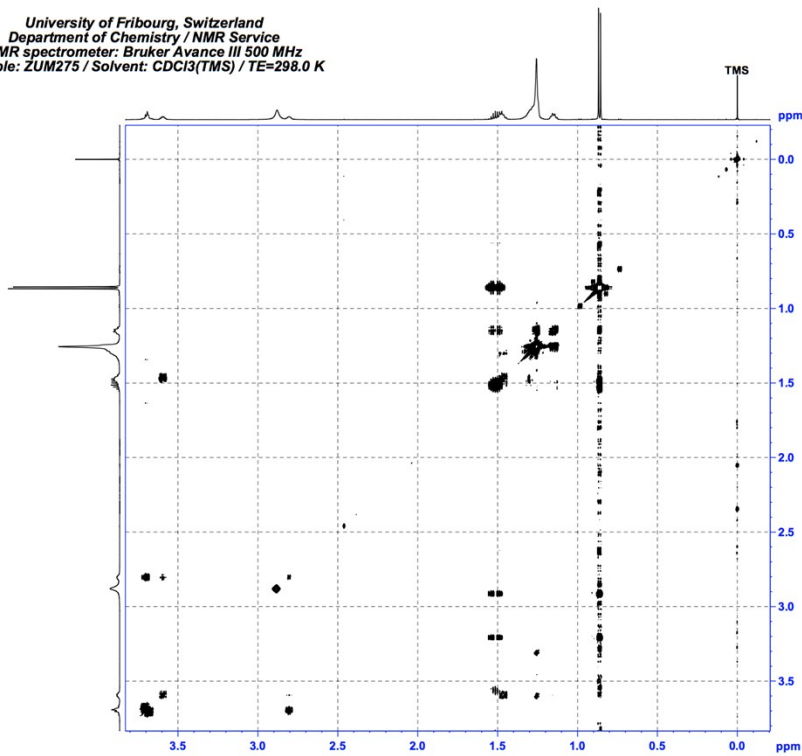

2D COSY (500.13 MHz)

```
Current Data Parameters
NAME      zum6107
EXPNO    4
PROCNO   1

F2 - Acquisition Parameters
Date_    20160310
Time     23.30
INSTRUM  spect
PROBHD   5 mm PABBO BB-
PULPROG  cosygpppof
TD        4096
SOLVENT  CDCl3
NS        32
DS         8
SWH       2200.704 Hz
FIDRES    0.5372611 Hz
AQ         0.9306612 sec
RG         68.06
DW        227.200 usec
DE         6.50 usec
TE        298.2 K
D0         0.0000000 sec
D1         1.2000000 sec
D11        0.4300000 sec
D12        0.0000200 sec
D13        0.0000000 sec
D16        0.0002000 sec
IN0        0.0004544 sec

===== CHANNEL f1 =====
NUC1      1H
P0        11.30 usec
P1        11.30 usec
P17       2500.00 usec
PLW1      16.0000000 W
PLW10     3.02220011 W
SFO1      500.1309080 MHz

===== GRADIENT CHANNEL =====
GPNAM1    SMSQ10.100
GPNAM2    SMSQ10.100
GPNAM3    SMSQ10.100
GPZ1      10.00 %
GPZ2      10.00 %
GPZ3      40.10 %
P16       1000.00 usec

F1 - Acquisition parameters
TD         512
SFO1      500.1309 MHz
FIDRES     4.298250 Hz
SW         4.450 ppm
FnMODE     QF

F2 - Processing parameters
SI         2048
SF         500.130061 MHz
WDW        SINE
SSB         0
LB          0 Hz
GB          0
PC          1.40

F1 - Processing parameters
SI         512
MC2        QF
SF         500.130066 MHz
WDW        States
SSB         0
LB          0 Hz
GB          0
```

University of Fribourg, Switzerland  
 Department of Chemistry / NMR Service  
 NMR spectrometer: Bruker Avance III 500 MHz  
 Sample: ZUM275 / Solvent: CDCl<sub>3</sub>(TMS) / TE=298.0 K

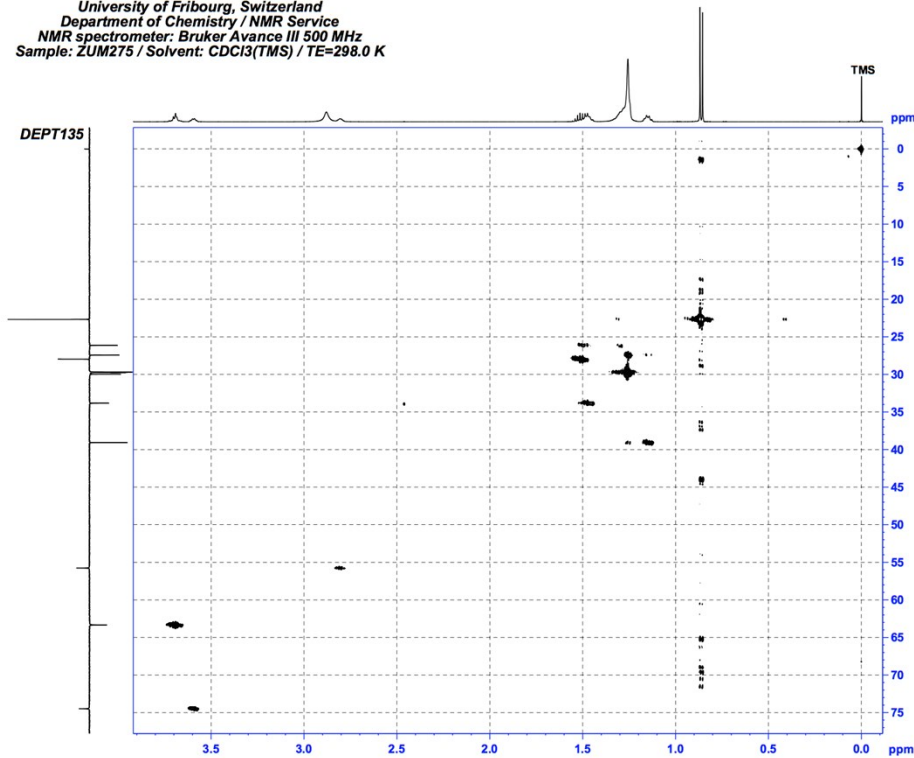

2D HMQC

```
Current Data Parameters
NAME      zum6107
EXPNO    5
PROCNO   1

F2 - Acquisition Parameters
Date_    20160311
Time     9.56
INSTRUM  spect
PROBHD   5 mm PABBO BB-
PULPROG  hmqcgpof
TD        2048
SOLVENT  CDCl3
NS        64
DS         8
SWH       2200.704 Hz
FIDRES    1.074563 Hz
AQ         0.4653558 sec
RG         194.97
DW        227.200 usec
DE         6.50 usec
TE        298.3 K
D0         0.0000000 sec
D1         1.0000000 sec
D2         0.0034628 sec
D12        0.0000200 sec
D13        0.0000000 sec
D16        0.0002000 sec
IN0        0.0004544 sec

===== CHANNEL f1 =====
NUC1      1H
P1        11.30 usec
P2        22.60 usec
PLW1      16.0000000 W
PLW10     1.94319393 W
SFO1      500.1309080 MHz

===== CHANNEL f2 =====
CPDPRG2   gnrp
NUC2      13C
P3         9.60 usec
PCPD2     70.00 usec
PLW2      98.0000000 W
PLW10     1.94319393 W
SFO2     125.7625000 MHz

===== GRADIENT CHANNEL =====
GPNAM1    SMSQ10.100
GPNAM2    SMSQ10.100
GPNAM3    SMSQ10.100
GPZ1      10.00 %
GPZ2      30.00 %
GPZ3      40.10 %
P16       1000.00 usec

F1 - Acquisition parameters
TD         256
SFO1      125.7625 MHz
FIDRES     43.989304 Hz
SW         88.544 ppm
FnMODE     QF

F2 - Processing parameters
SI         2048
SF         500.130050 MHz
WDW        SINE
SSB         0
LB          0 Hz
GB          0
PC          1.40

F1 - Processing parameters
SI         512
MC2        QF
SF         125.757704 MHz
WDW        States
SSB         0
LB          0 Hz
GB          0
```

**<sup>13</sup>C{<sup>1</sup>H} NMR (125.76 MHz), Inverse gated decoupling (d1=20.0 sec.)**

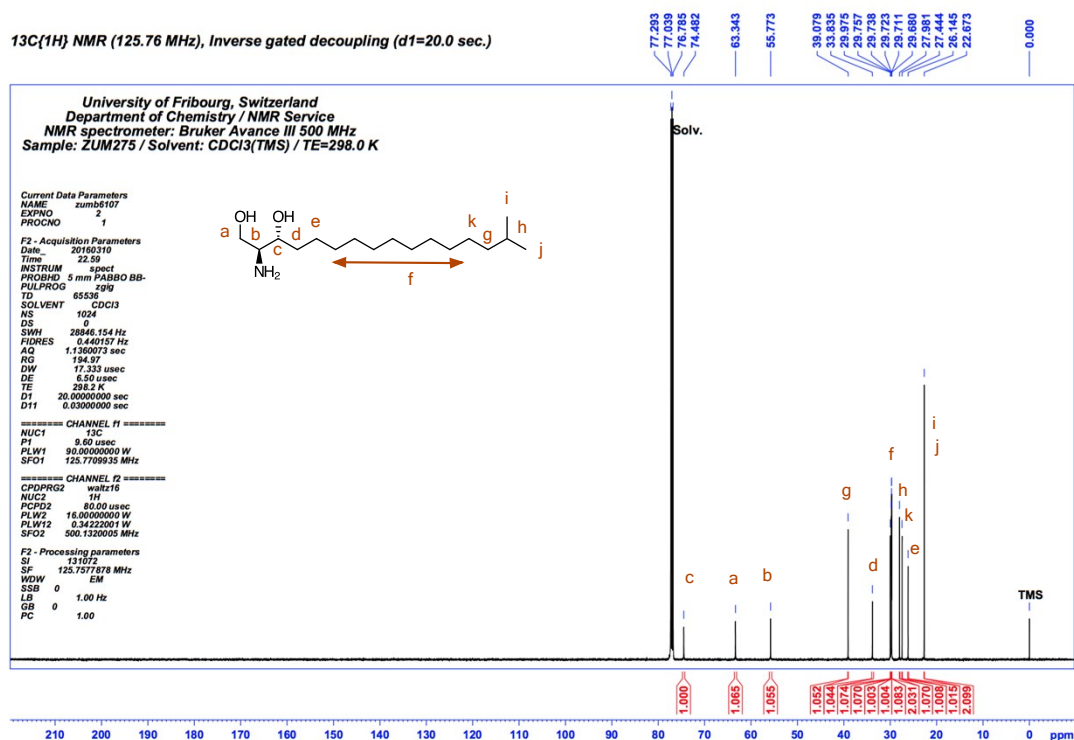

**(2*S*,3*R*)-2-amino-15-methylhexadecan-3-ol (10)**

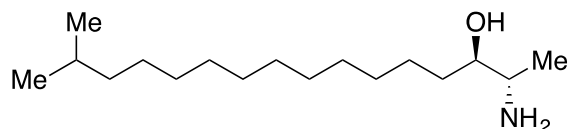

**Method A :** To (*R*)-13-methyl-1-((*S*)-1-((*R*)-1-phenylethyl)aziridin-2-yl) tetradecan-1-ol **7** (25 mg, 150  $\mu$ mol) in 1.8 mL MeOH was added Pd/C (1.3 mg) and the mixture was stirred under 1 atm. of H<sub>2</sub> for 48 h. Then the mixture was filtered and the solvent was evaporated under reduced pressure. The crude material was purified on a silica gel column (CH<sub>2</sub>Cl<sub>2</sub>/MeOH/NH<sub>4</sub>OH 0.875:0.11:0.015) to give compound **9** (3 mg, 11  $\mu$ mol, 8 %).

**Method B :** To (*R*)-13-methyl-1-((*S*)-1-((*R*)-1-phenylethyl)aziridin-2-yl) tetradecan-1-ol **7** (65.9 mg, 176  $\mu$ mol) in 5 mL MeOH was added Pd(OH)<sub>2</sub>/C (7 mg.) and the mixture was stirred under 1 atm. of H<sub>2</sub> for 48 h. Then the mixture was filtered and the solvents were evaporated under reduced pressure. The crude material was purified on a silica gel column (CH<sub>2</sub>Cl<sub>2</sub>/MeOH/NH<sub>4</sub>OH 0.875:0.11:0.015) to give compound **10** (20.2 mg, 74.4  $\mu$ mol, 42 %).

$[\alpha]_D^{24} = + 8.6$  (c 1.00, CHCl<sub>3</sub>).

$n_D^{20} = 1.45$  (CH<sub>2</sub>Cl<sub>2</sub>/MeOH/NH<sub>4</sub>OH 0.875:0.11:0.015).

HRMS-ESI (m/z): [M+H]<sup>+</sup> calcd for C<sub>17</sub>H<sub>38</sub>NO: 272.2947; found 272.2950.

IR (Golden Gate): 2915 (s), 2850 (s), 1587 (m), 1468 (m), 1366 (m), 1093 (m).

<sup>1</sup>H NMR (400 MHz, CDCl<sub>3</sub>)  $\delta$  3.49 (dt, *J* = 4.2, 3.8 Hz, 1H), 3.01 (dq, *J* = 6.2, 3.3, 3.2 Hz, 1H), 2.25 (br, OH/NH<sub>2</sub>, 3H), 1.55 – 1.47 (m, 2H), 1.44 – 1.35 (m, 2H), 1.30 – 1.26 (m, 17H), 1.17 – 1.13 (m, 2H), 1.04 (d, *J* = 6.6 Hz, 3H), 0.86 (d, *J* = 6.6 Hz, 6H).

$^{13}\text{C}$  NMR (125.76 MHz,  $\text{CDCl}_3$ )  $\delta$  74.33, 50.49, 39.07, 32.50, 29.96, 29.78, 29.74, 29.67, 29.64, 29.63, 27, 98, 27.43, 26.21, 22.67, 16.37.

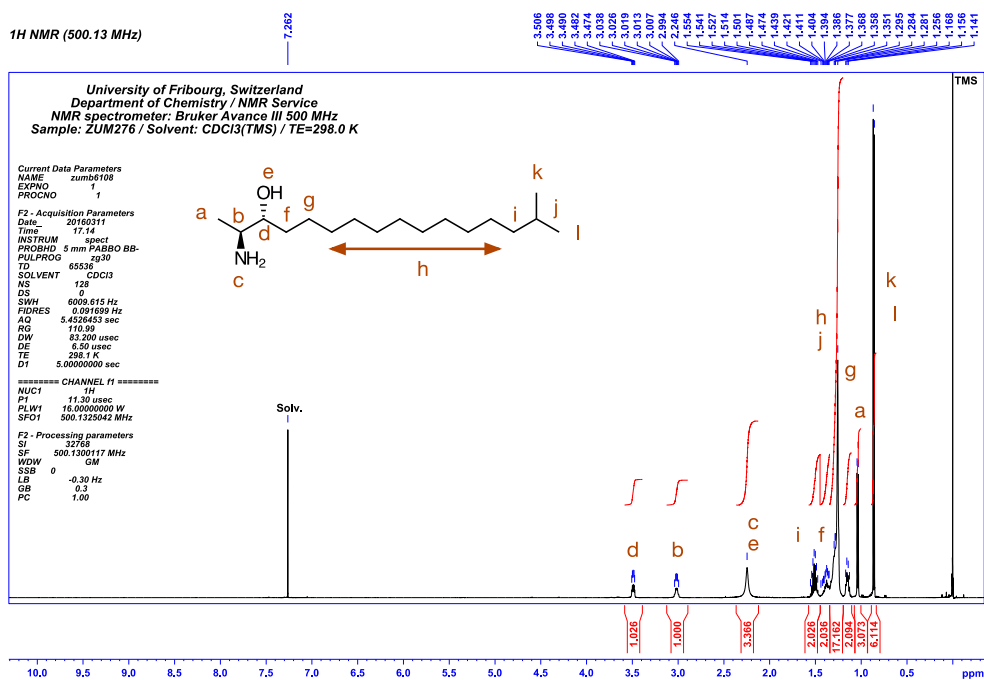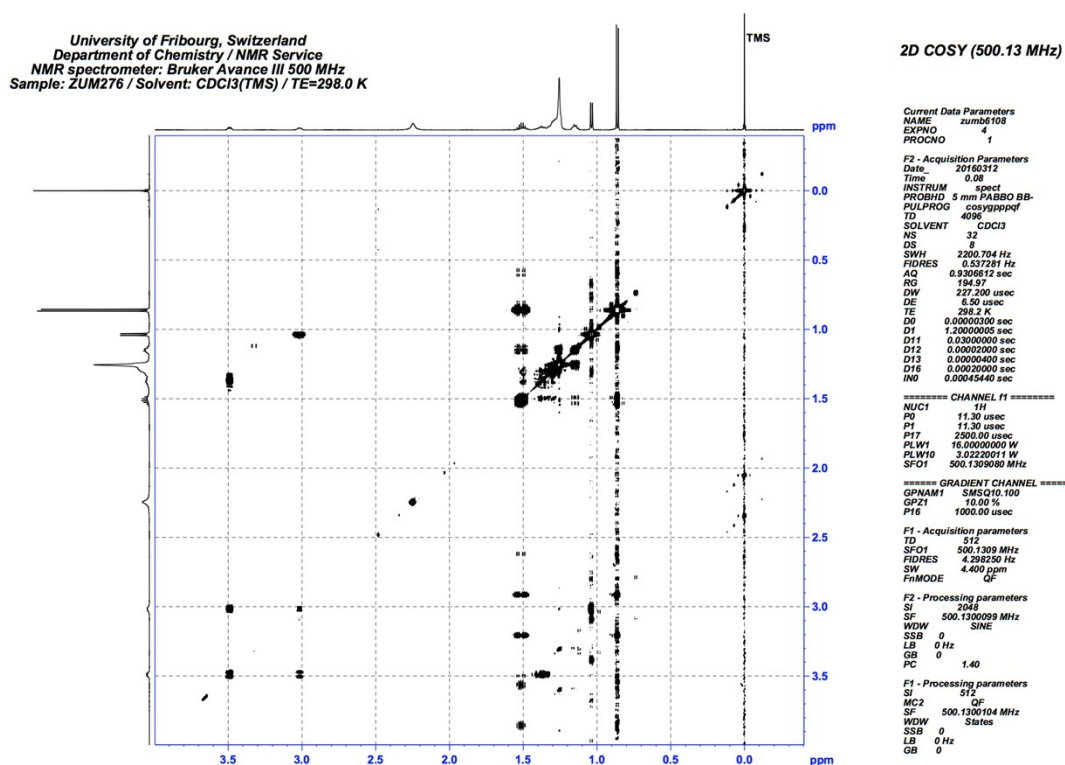

University of Fribourg, Switzerland  
 Department of Chemistry / NMR Service  
 NMR spectrometer: Bruker Avance III 500 MHz  
 Sample: ZUM276 / Solvent: CDCl3(TMS) / TE=298.0 K

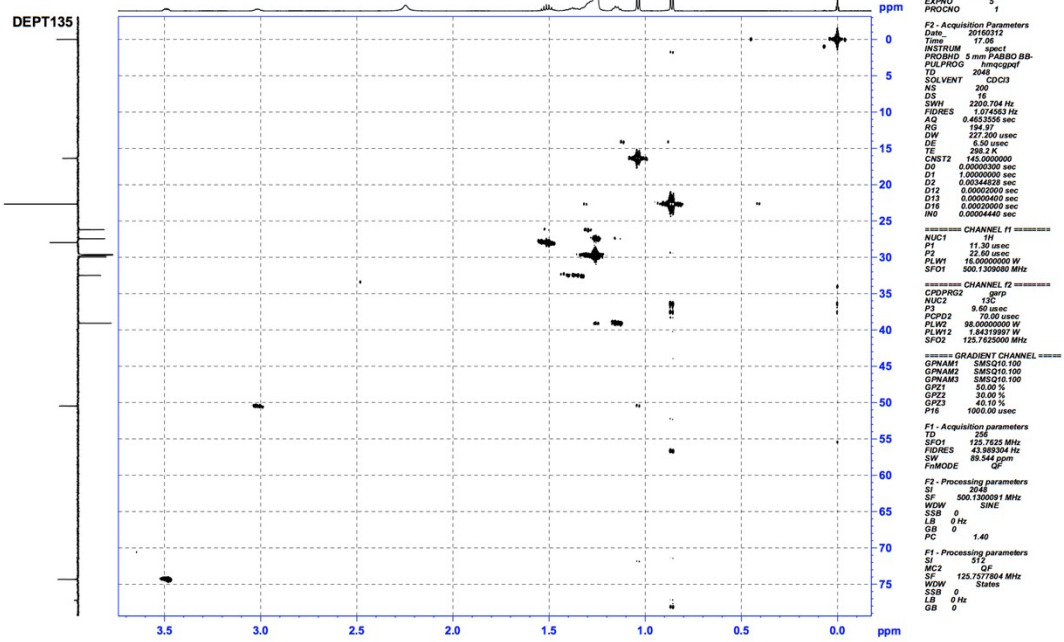

13C{1H} NMR (125.76 MHz), Inverse gated decoupling (d1=20.0 sec.)

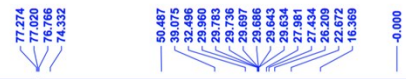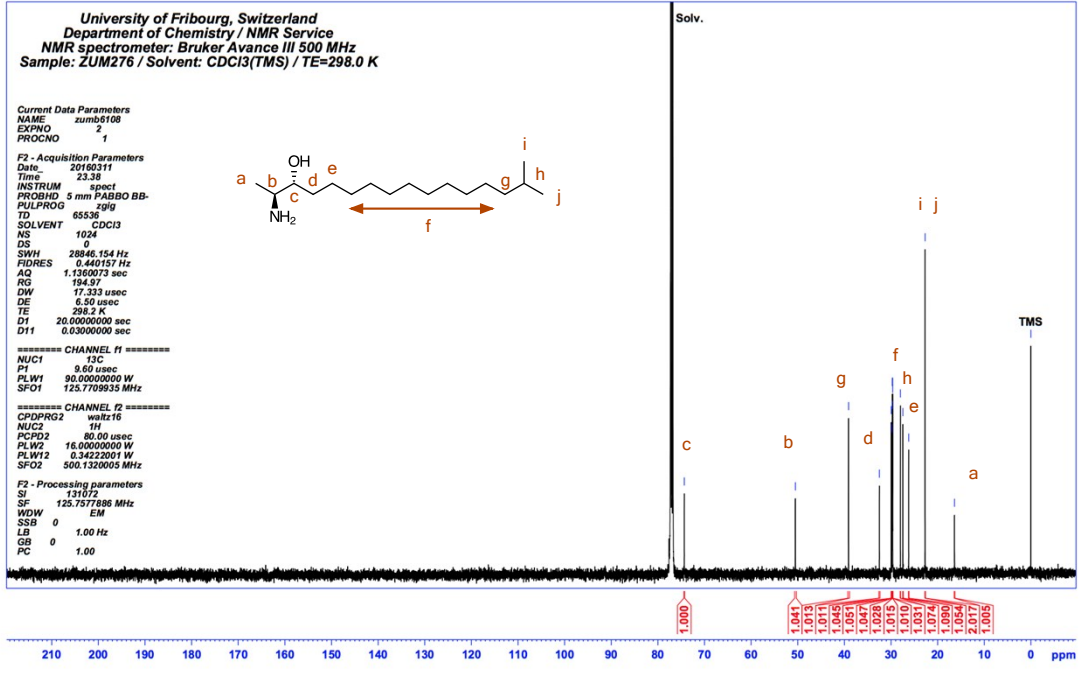

## Supplementary Figures:

### Supplementary Figure 1.

Labelling of *C. elegans* sphingoid bases using amino acids. **(a)** C17 sphingoid bases detected in animals fed with bacterial diets containing heavy amino acids leucine, isoleucine, valine or lysine, the light and the  $^{13}\text{C}$ -containing +4 and +5 isotopic peaks are shown; **(b)** relative amounts of +5 isotopic peak with  $^{13}\text{C}$  label incorporation compared to light C17 sphingoid base without isotopic correction; **(c)** scheme of label incorporation from heavy isotope labelled amino acids via branched chain fatty acids into sphingoid bases.

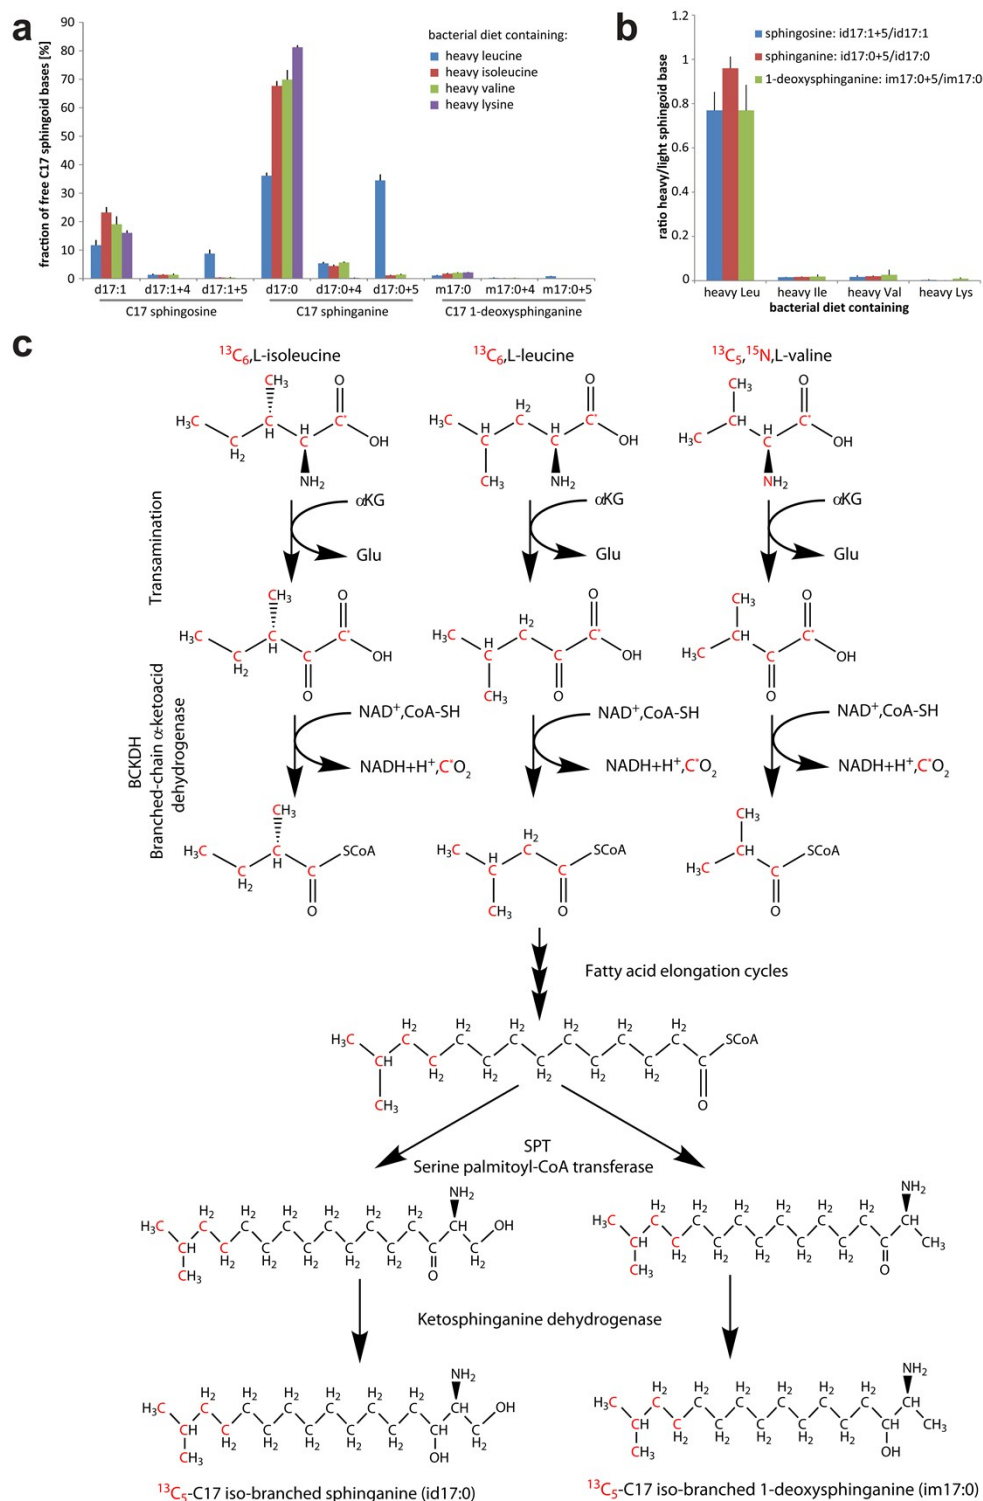

## Supplementary Figure 2.

Calculation of width of GFP positive intestinal lumen and width of F-actin signal visualized by SiR-actin. **(a-b)** representative line profile of fluorescent signals from OP50 GFP in the intestinal lumen (cyan line, **a**) and SiR-actin (magenta line, **b**) and their Gaussian fits (dashed lines) recorded perpendicular to the intestinal lumen in animals treated with ethanol vehicle; **(c-e)** average Gaussian fits of GFP signals (cyan) and SiR-actin (magenta) for animals treated with solvent control EtOH **(c)**, C17 iso-branched sphinganine, id17:0 **(d)** and 1-deoxy C17 iso-branched sphinganine, im17:0 **(e)**; **(f)** width of the intestinal lumen as given by the full width at half maximum of a single Gaussian fit of the GFP signal; **(g)** width of the apical F-actin signal as calculated by the width of two Gaussian fits of the SiR-actin signal, statistical significance determined by Welch's t-test \*  $p < 0.05$ , \*\*\*  $p < 0.005$ .

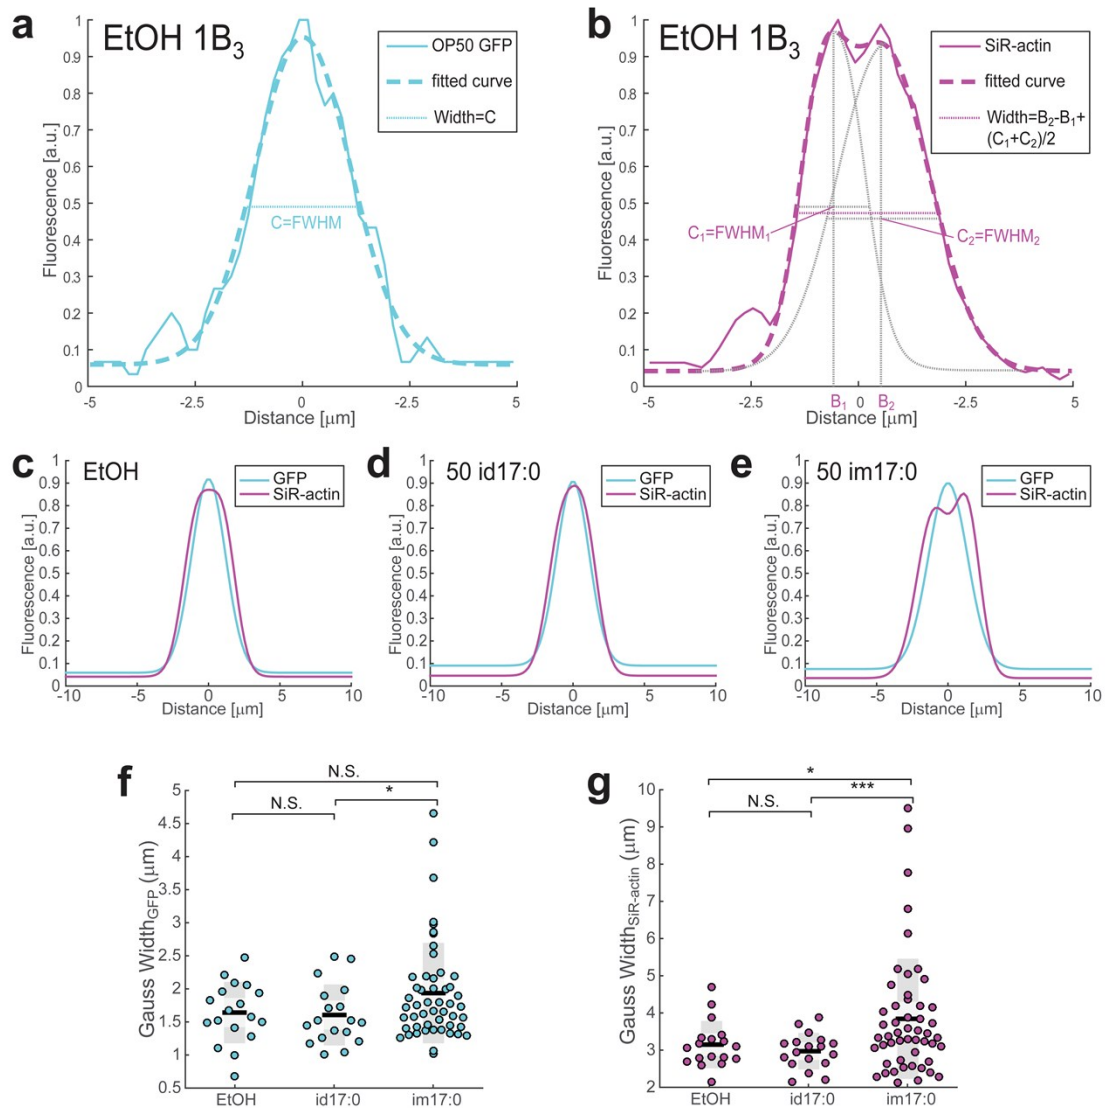



**Supplementary Figure 3.**

Saturated image of Figure 5 to better visualize growth of *lcb1Δ* strain on racemic C16 DL-sphinganine (DL-d16:0).

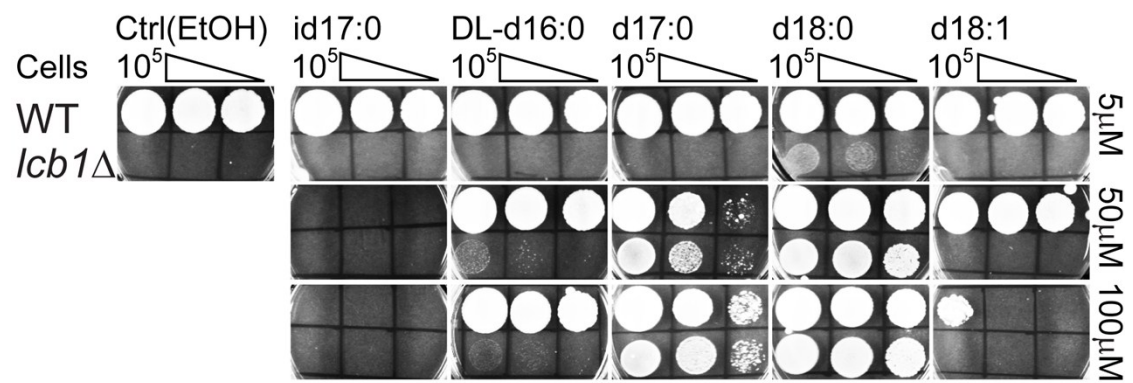

Supplement: SC-008-C6SC04831E-s001.pdf [file SC-008-C6SC04831E-s001.pdf]
